# Supplementary material for: The improvement of photocatalytic performance for hydrogen evolution over mesoporous g-C3N4 modified with nitrogen defects
Source: Royal Society of Chemistry journal article supplement (doi:10.1039/d0se01012j), 2020-01-01
Supplement: d0se01012j1.pdf [file d0se01012j1.pdf]

## Supporting Information

### **The improvement of photocatalytic performance for hydrogen evolution over mesoporous g-C<sub>3</sub>N<sub>4</sub> with nitrogen defects**

Lei Liang<sup>a</sup>, Lei Shi<sup>a\*</sup>, Fangxiao Wang<sup>c</sup>, Haihua Wang<sup>b</sup>, Wei Qi<sup>b\*</sup>

a: School of Petrochemical Engineering, Liaoning Shihua University, Fushun, 113001,  
China

b: Shenyang National Laboratory for Materials Science, Institute of Metal Research,  
Chinese Academy of Sciences, Shenyang, 110016, China

c: College of Chemistry, Chemical Engineering and Material Science, Shandong  
Normal University, Jinan, 250014, China

\*Corresponding author: Lei Shi, [shilei\\_hit@qq.com](mailto:shilei_hit@qq.com); Wei Qi, [wqi@imr.ac.cn](mailto:wqi@imr.ac.cn)

Tel: +86-18340316558

**Table S1** Comparison of photocatalytic performance of recent reports and this work.

| Samples                                                        | Light source  | Co-catalyst mass (wt%) | HER                                         | References |
|----------------------------------------------------------------|---------------|------------------------|---------------------------------------------|------------|
| Nitrogen vacancy modified g-C <sub>3</sub> N <sub>4</sub>      | Visible light | Pt 3wt%                | 3147 $\mu\text{mol g}^{-1} \text{h}^{-1}$   | [1]        |
| Crystalline g-C <sub>3</sub> N <sub>4</sub>                    | Visible light | Pt 3wt%                | 660 $\mu\text{mol g}^{-1} \text{h}^{-1}$    | [2]        |
| K-doped g-C <sub>3</sub> N <sub>4</sub> nanosheets             | Visible light | Pt 3wt%                | 1337.2 $\mu\text{mol g}^{-1} \text{h}^{-1}$ | [3]        |
| Na and cyano-group co-modified g-C <sub>3</sub> N <sub>4</sub> | Visible light | Pt 3wt%                | 985 $\mu\text{mol g}^{-1} \text{h}^{-1}$    | [4]        |
| Nitrogen vacancy g-C <sub>3</sub> N <sub>4</sub> nanosheets    | Visible light | Pt 3wt%                | 1287 $\mu\text{mol g}^{-1} \text{h}^{-1}$   | [5]        |
| CNMCN2                                                         | Visible light | Pt 3wt%                | 4978 $\mu\text{mol g}^{-1} \text{h}^{-1}$   | This work  |

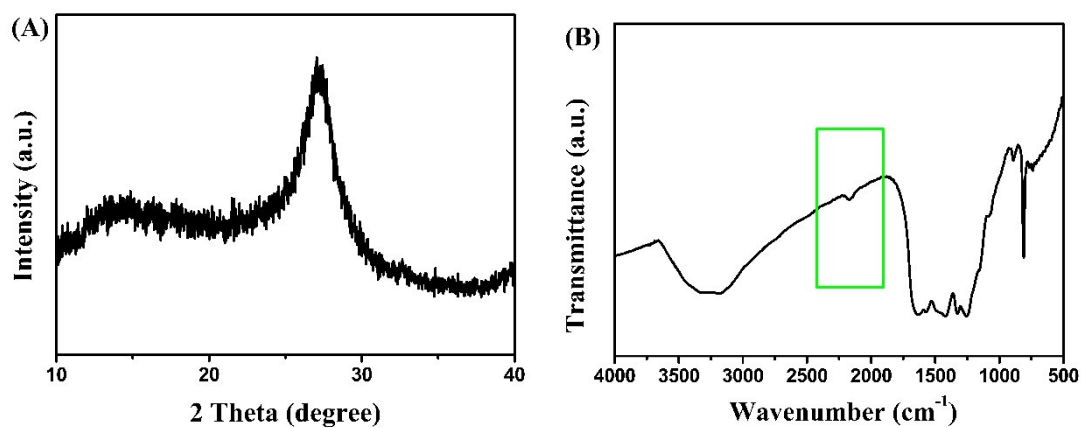

**Fig. S1** (A) XRD patterns and (B) FTIR of CNMCN2 before and after four times cycling.

## Reference

- [1] L. Liang, L. Shi, F. Wang, L. Yao, W. Qi, Synthesis and photo-catalytic activity of porous g-C<sub>3</sub>N<sub>4</sub>: Promotion effect of nitrogen vacancy in H<sub>2</sub> evolution and pollutant degradation reactions, *International Journal of Hydrogen Energy* 44 (2019) 16315-16326.
- [2] L. Lin, W. Ren, C. Wang, A.M. Asiric, J. Zhang, X. Wang, Crystalline carbon nitride semiconductors prepared at different temperatures for photocatalytic hydrogen production, *Applied Catalysis B: Environmental* 231(2018) 234-241.
- [3] Y. Wang, S. Zhao, Y. Zhang, J. Fang, Y. Zhou, S. Yuan, C. Zhang, W. Chen, One-pot synthesis of K-doped g-C<sub>3</sub>N<sub>4</sub> nanosheets with enhanced photocatalytic hydrogen production under visible-light irradiation, *Applied Surface Science* 440 (2018) 258-265.
- [4] G. Liu, S. Yan, L. Shi, L. Yao, The improvement of photocatalysis H<sub>2</sub> evolution over g-C<sub>3</sub>N<sub>4</sub> with Na and cyano-group co-modification. *Frontiers in Chemistry* 7 (2019) 639.
- [5] W. G. Tu, Y. Xu, J. Wang, B. Zhang, T. Zhou, S. Yin, S. Wu, C. Li, Y. Huang, Y. Zhou, Z. Zou, J. Robertson, M. Kraft, R. Xu, Investigating the role of tunable nitrogen vacancies in graphitic carbon nitride nanosheets for efficient visible-light-driven H<sub>2</sub> evolution and CO<sub>2</sub> reduction, *ACS Sustainable Chem. Eng.* 58 (2017) 7260-7268
